# Supplementary material for: A naphthalimide-based thermometer: heat-induced fluorescence “turn-on” sensing in a wide temperature range in ambient atmosphere
Source: Royal Society of Chemistry journal article supplement (doi:10.1039/c9nj06101k), 2020-01-01
Supplement: c9nj06101k1.pdf [file c9nj06101k1.pdf]

## Electronic Supplementary Information

### A Naphthalimide-based Thermometer: heat-induce fluorescent “turn-on” sensing in a wide temperature range in atmosphere

Shuxin Wang, Jian Cao,\* and Chenhong Lu

School of Chemistry and Chemical Engineering, Shanghai University of Engineering

Science, 333 Longteng Road, Shanghai, 201620, P. R. China Fax: 86-21-67791214

E-mail: caoj@sues.edu.cn

#### **Contents**

- 1. General information**
- 2. Uv/visible absorption and fluorescene spectra of free sensors NapPT-1, NapPT-2 and compound 2**
- 3. The spectra response of fluorescent sensor NapPT-2 and compound 2 over wide temperature range**
- 4. The reversibility and stability of fluorescent sensor NapPT-2 in MOE and water**
- 5. The density functional theory of NapPT-2 and compound 2**
- 6. Fluorescent quantum yield of compound 2, NapPT-1 and NapPT-2 in all kinds of solvents**
- 7. The fluorescent thermometer performance parameters**

## **1. General information**

### **1.1 Materials and Instruments**

All reagents and solvents were used as received without further purification. Deionized water was used in the experiments throughout. Silica gel (200-300 mesh) was used for column chromatography. High resolution mass spectra measurements were performed on a LCMS-IT-TOF MS spectrometry. NMR spectra were recorded on a Varian 400 MHz with chemical shifts reported as ppm (in DMSO-*d*<sub>6</sub> or CDCl<sub>3</sub>, TMS as internal standard). Fluorescent measurements were performed on a FS-5 spectrophotometer (Edinburgh, Britain) and the slit width was set as 2 nm for excitation and emission, respectively. Absorption spectrum was measured on a SHIMADZU UV-3600 spectrophotometer. Solvents were generally dried and distilled prior to use. The measurements were performed at room temperature on air-equilibrate solutions (10<sup>-6</sup> M). Dark-Field (DF) microscopy imaging is performed under a Nikon inverted microscope (ECLIPSE Ti-U). In DF mode, the microscope utilizes a Nikon Plan Fluor 100×0.5-1.3 oil iris objective and a Nikon DF condenser.

### **1.2 Synthesis and Characterization**

#### **Synthesis of compound 2**

The mixture of N-butyl-4-bromonaphthalimide (3.31 g, 0.01 mol) and 2.85 g formylphenyl piperazine (0.015 mol, 1.5 equiv.) in 5 mL N,N-ethyl-formamide (DMF)

was refluxed under nitrogen atmosphere for 6 h. The TLC technology inspected the reaction degree. The solvent was evaporated under reduced pressure and washed with 20 mL of brine after the completion of the reaction.

After extracted with 75 mL (3×25 mL) dichloromethane and dried with anhydrous sodium sulfate, the crude product was chromatographed using an eluent of petroleum ether : ethyl acetate (5 : 1), which was purified (silica gel, 200 mesh) to yield 2.74 g of a yellow solid powder, a yield of 62%.  $^1\text{H}$  NMR (400 MHz,  $\text{CD}_3\text{CN}$ )  $\delta$  9.87 (s, 1H), 8.64 (dd,  $J$  = 7.4, 1.2 Hz, 1H), 8.58 (d,  $J$  = 8.0 Hz, 1H), 8.49 (dd,  $J$  = 8.5, 1.3 Hz, 1H), 7.82 (d,  $J$  = 8.9 Hz, 3H), 7.36 (d,  $J$  = 8.1 Hz, 1H), 7.14 (d,  $J$  = 8.5 Hz, 2H). 4.25 - 4.16 (m, 2H), 3.74 (t,  $J$  = 5.0 Hz, 4H), 3.45 (t,  $J$  = 5.0 Hz, 4H), 1.74 (p,  $J$  = 7.7 Hz, 2H), 1.51 - 1.44 (m, 2H), 1.00 (t,  $J$  = 7.3 Hz, 3H).  $^{13}\text{C}$  NMR (100 MHz,  $\text{CDCl}_3$ )  $\delta$  190.36, 164.35, 163.91, 155.10, 154.92, 132.32, 131.84, 131.18, 129.72, 128.02, 126.31, 126.02, 115.20, 114.08, 52.71, 47.64, 40.14, 30.27, 20.38, 13.80. HRMS (ESI) calcd for  $\text{C}_{27}\text{H}_{28}\text{N}_3\text{O}_3$ : 442.2131; found: 442.2124.  $[\text{M} + \text{H}]^+$ .

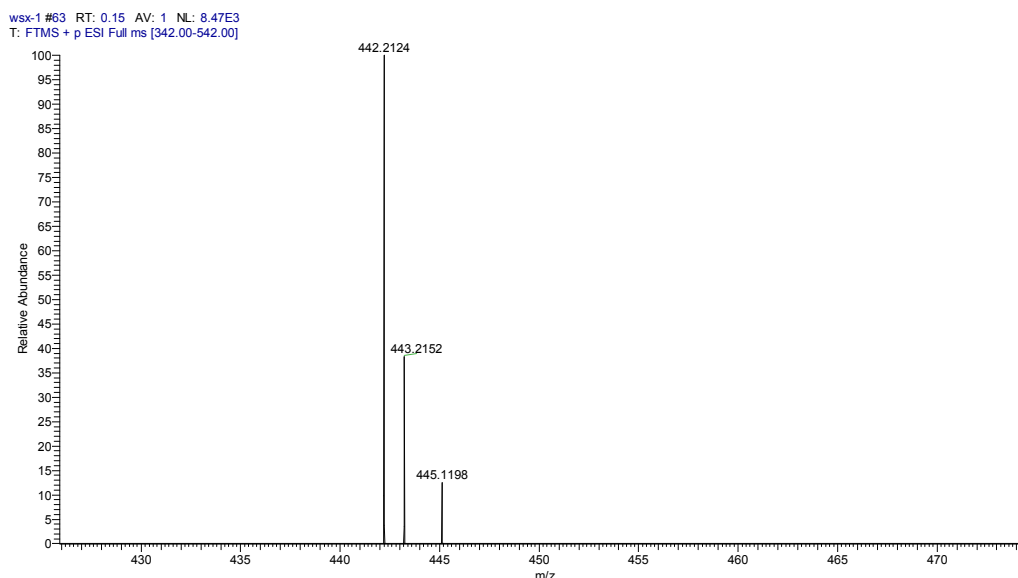

Figure S1 HRMS of compound 2

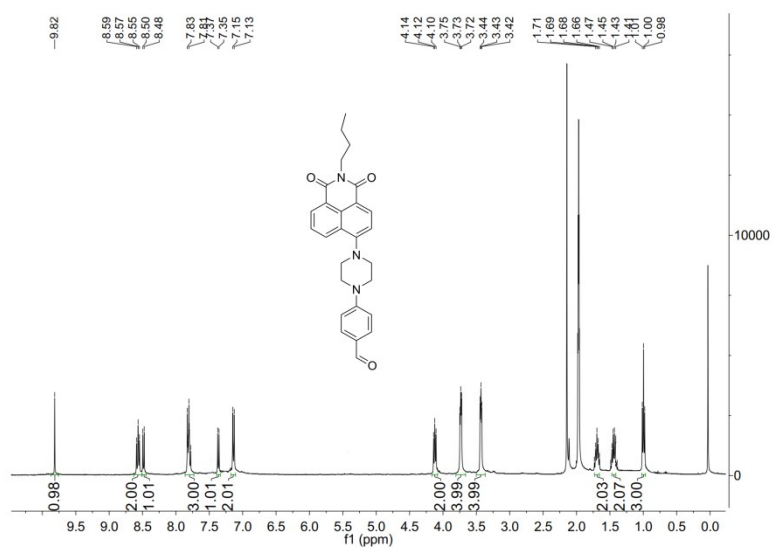

Figure S2 <sup>1</sup>H NMR spectrum of compound 2 in CD<sub>3</sub>CN

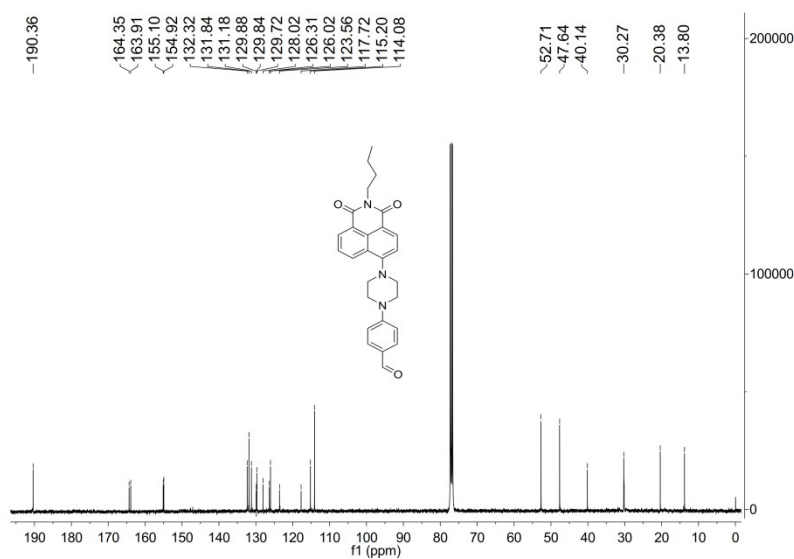

Figure S3 <sup>13</sup>C NMR spectrum of compound 2 in CDCl<sub>3</sub>

## Synthesis of Sensor NapPT-1

The mixture of compound 2 (200 mg, 0.45 mmol) and propanethiol (51.6 mg, 0.675 mmol, 1.5 equiv.) in 25 ml dichloromethane was stirred at 0 °C under nitrogen atmosphere for 10 min. 0.04 mL boron trifluoride diethyl ether solution, diluted with

1 mL dichloromethane, was added dropwise to the reaction solution. The solution was continuously stirring for 1 h at the room temperature. Subsequently, the reaction solution was washed with 75 ml (3×25 mL) saturated sodium chloride solution, extracted with methylene chloride, and dried with anhydrous sodium sulfate. The crude product was purified by silica chromatography (PE : EtOAc = 10 : 1, v : v) to afford an yellow solid product (259.29 mg, a yield of 99%). <sup>1</sup>H NMR (400 MHz, CD<sub>3</sub>CN) δ 8.56 (t, *J* = 7.5 Hz, 2H), 8.49 (d, *J* = 8.1 Hz, 1H), 7.84 - 7.75 (m, 1H), 7.38 (dd, *J* = 8.4, 3.4 Hz, 3H), 7.03 (d, *J* = 8.7 Hz, 2H), 4.97 (s, 1H), 4.16 - 4.07 (m, 2H), 3.55 - 3.47 (m, 4H), 3.46 - 3.40 (m, 4H), 2.54 (dtd, *J* = 20.1, 12.8, 7.3 Hz, 5H), 1.60 (dd, *J* = 14.5, 7.3 Hz, 4H), 1.44 (dd, *J* = 14.5, 7.0 Hz, 3H), 0.98 (dt, *J* = 11.0, 7.3 Hz, 9H). <sup>13</sup>C NMR (100 MHz, CDCl<sub>3</sub>) δ 164.43, 164.00, 155.54, 150.41, 132.43, 132.07, 131.13, 130.08, 129.83, 128.65, 126.22, 125.83, 116.04, 115.04, 53.06, 52.66, 49.32, 40.13, 34.36, 30.28, 22.61, 20.40, 13.86, 13.57. HRMS (ESI) calcd for C<sub>33</sub>H<sub>42</sub>N<sub>3</sub>O<sub>2</sub>S<sub>2</sub>: 576.2718; found: 576.2709. [M + H]<sup>+</sup>.

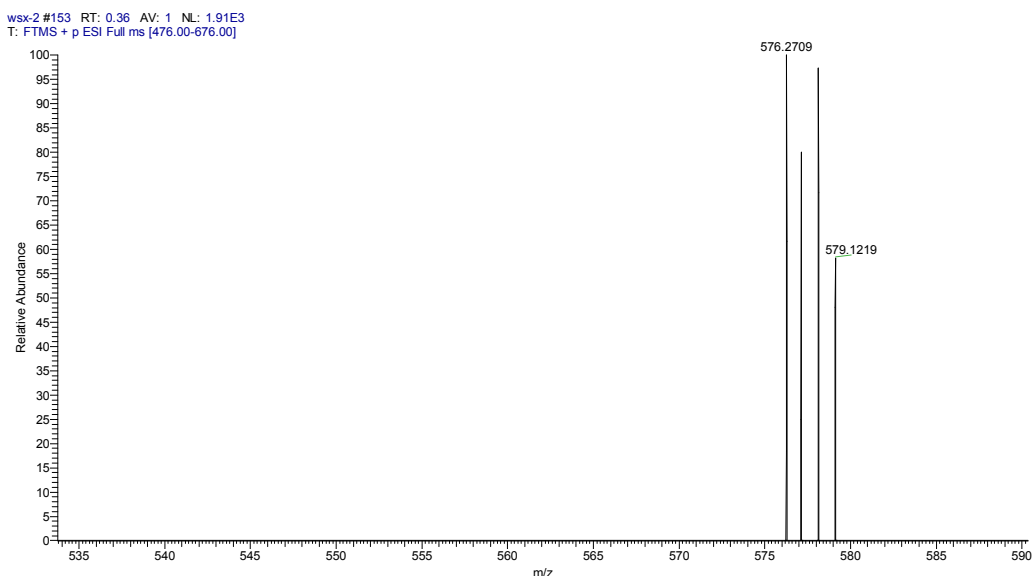

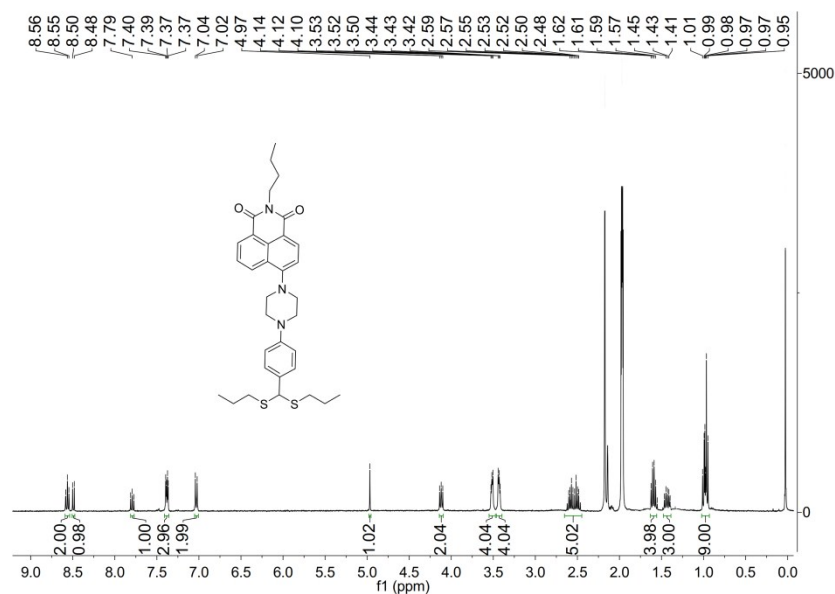

Figure S5 <sup>1</sup>H NMR spectrum of NapPT-1 in CD<sub>3</sub>CN

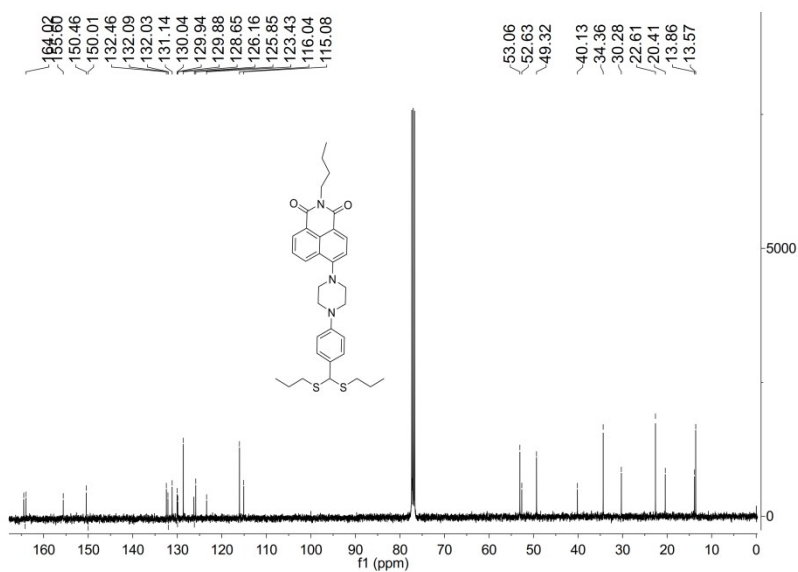

Figure S6 <sup>13</sup>C NMR spectrum of NapPT-1 in CDCl<sub>3</sub>

## Synthesis of sensor NapPT-2

The mixture of Compound 2 (200 mg, 0.45 mmol) and 1-methylthioethanethiol (51.6 mg, 0.675 mmol, 1.5 equiv.) in 20 mL dichloromethane were stirred at 0 °C under nitrogen atmosphere for 10 minutes. 0.04 mL boron trifluoride diethyl ether solution,

diluted with 1 mL dichloromethane, was added dropwise to the reaction solution. The reaction was continuously stirring for 1 h at the room temperature. Subsequently, the reaction solution was washed with 60 ml (3×20 mL) saturated sodium chloride solution, extracted with methylene chloride, and dried over anhydrous sodium sulfate. The crude product was purified by silica chromatography (PE : EtOAc = 10 : 1, v : v) to afford an yellow solid product (250.29 mg, a yield of 87%). <sup>1</sup>H NMR (400 MHz, CDCl<sub>3</sub>) δ 8.63 (d, *J* = 6.5 Hz, 1H), 8.57 (d, *J* = 8.0 Hz, 1H), 8.48 (d, *J* = 8.4 Hz, 1H), 7.77 - 7.71 (m, 1H), 7.49 - 7.45 (m, 2H), 7.31 (s, 1H), 7.00 (d, *J* = 8.7 Hz, 2H), 5.35 (s, 1H), 4.23 - 4.17 (m, 2H), 3.53 (d, *J* = 4.3 Hz, 4H), 3.45 (d, *J* = 4.8 Hz, 4H), 2.15 (dd, *J* = 9.6, 7.1 Hz, 5H), 1.80 - 1.68 (m, 2H), 1.60 (s, 9H), 1.47 (dd, *J* = 15.1, 7.4 Hz, 2H). 1.00 (t, *J* = 7.3 Hz, 3H). <sup>13</sup>C NMR (100 MHz, CDCl<sub>3</sub>) δ 164.41, 163.85, 155.56, 132.46, 131.14, 130.01, 129.89, 129.02, 126.27, 125.87, 116.06, 115.08, 53.05, 49.24, 47.51, 40.14, 30.28, 21.69, 20.40, 13.85. HRMS (ESI) calcd for C<sub>33</sub>H<sub>41</sub>N<sub>3</sub>O<sub>2</sub>S<sub>4</sub>: 639.2082; found: 639.2098. [M]<sup>+</sup>.

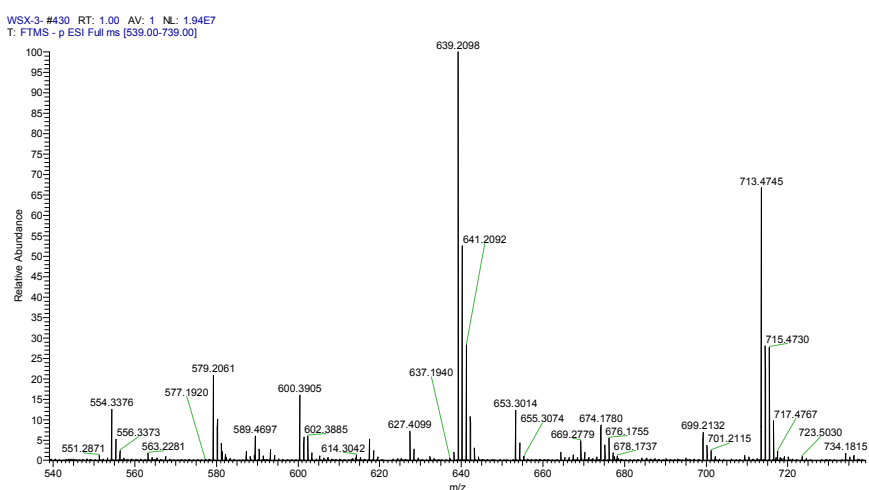

Figure S7 HRMS of NapPT-2

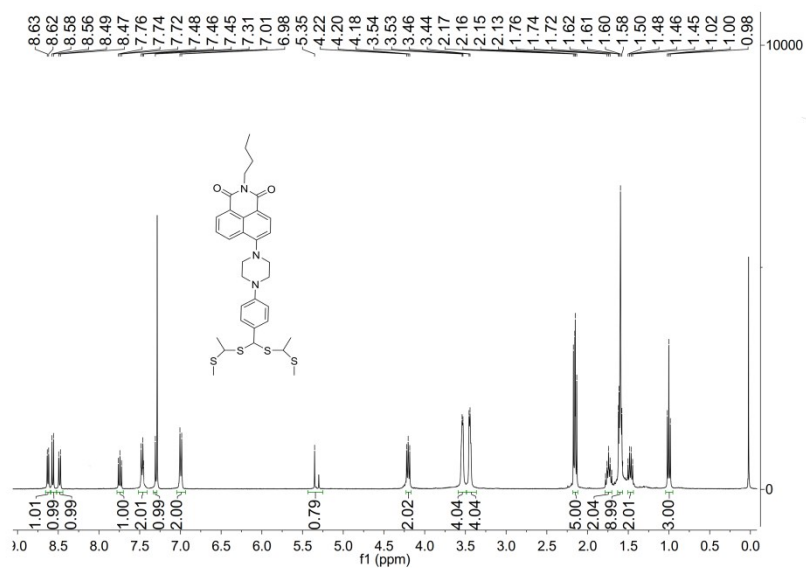

Figure S8 <sup>1</sup>H NMR spectrum of NapPT-2 in CDCl<sub>3</sub>

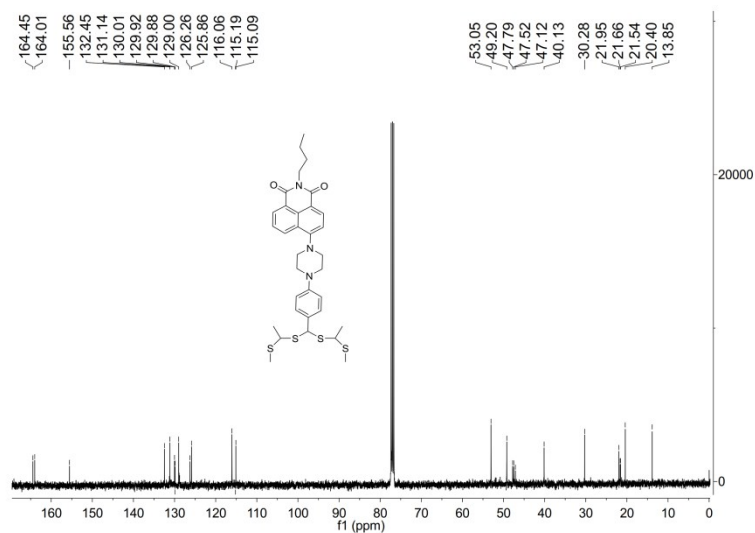

Figure S9 <sup>13</sup>C NMR spectrum of NapPT-2 in CDCl<sub>3</sub>

**2** Uv/visible absorption and fluorescene spectra of free sensors NapPT-1, NapPT-  
**2** and compound **2**

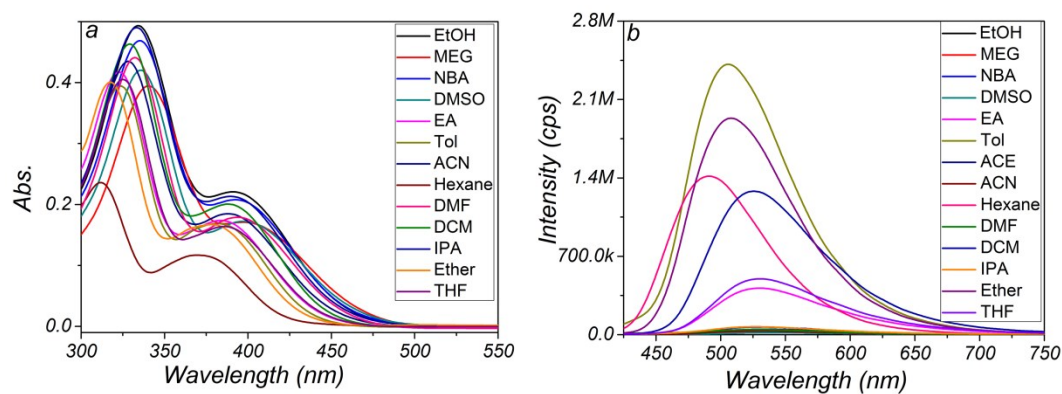

Figure S10 (a) UV/visible absorption spectra; (b) fluorescent spectra in all kinds of solutions of compound 2

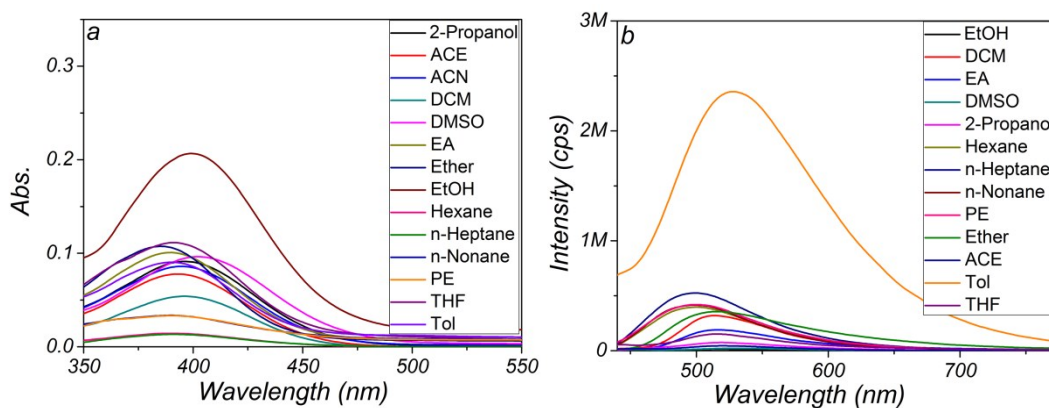

Figure S11 (a) UV/visible absorption spectra; (b) fluorescent spectra in all kinds of solutions of NapPT-1

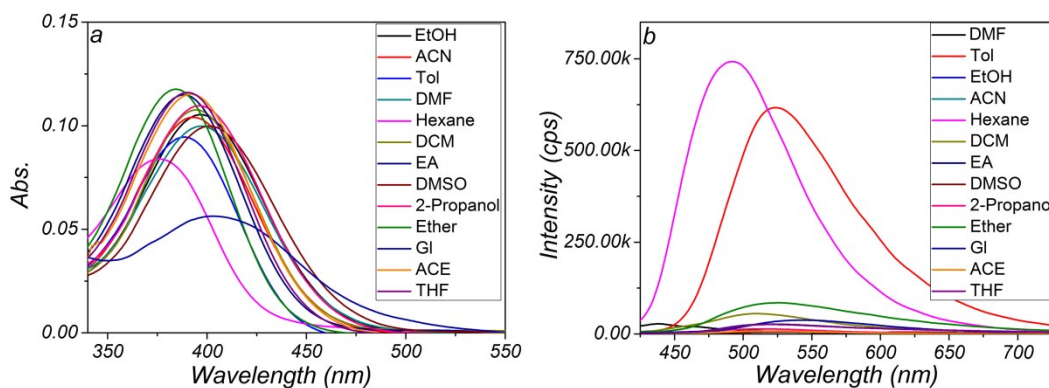

Figure S12 (a) UV/visible absorption spectra; (b) fluorescent spectra in all kinds of solutions of compound 3

## NapPT-2

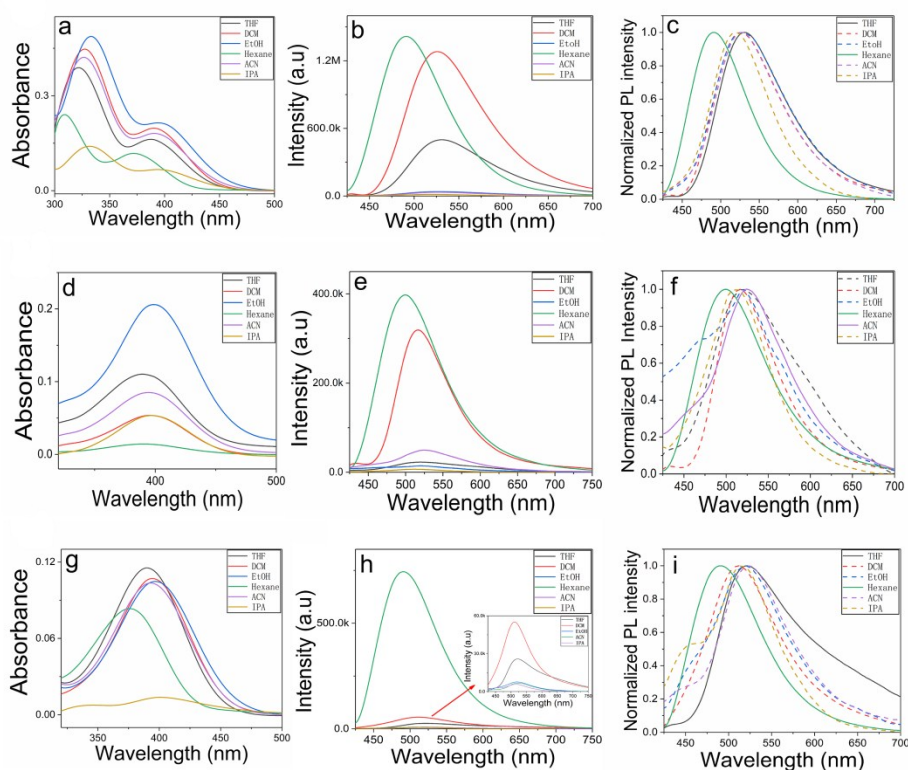

Figure S13 (a), (d) and (g) UV/visible absorption spectra; (b), (e) and (h) fluorescent spectra; (c),

(f) and (i) normalized intensity of fluorescent spectra of compound 2, NapPT-1 and NapPT-2 in

six solvents of different polarity (HEXANE: n-hexane; DCM: dichloromethane; THF:

tetrahydrofuran; MeCN: acetonitrile; IPA: i-propanol; EtOH: ethanol)

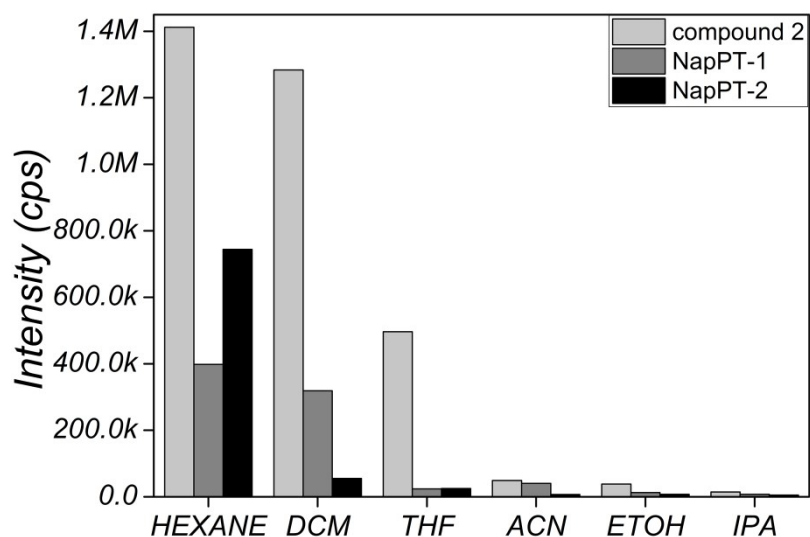

Figure S14 Fluorescent intensity of compound 2, NapPT-1 and NapPT-2 in six solvents of different polarity (HEXANE: n-hexane; DCM: dichloromethane; THF: tetrahydrofuran; MeCN: acetonitrile; IPA: i-propanol; EtOH: ethanol)

### 3 The spectra response of fluorescent sensor NapPT-2 and compound 2 over wide temperature range

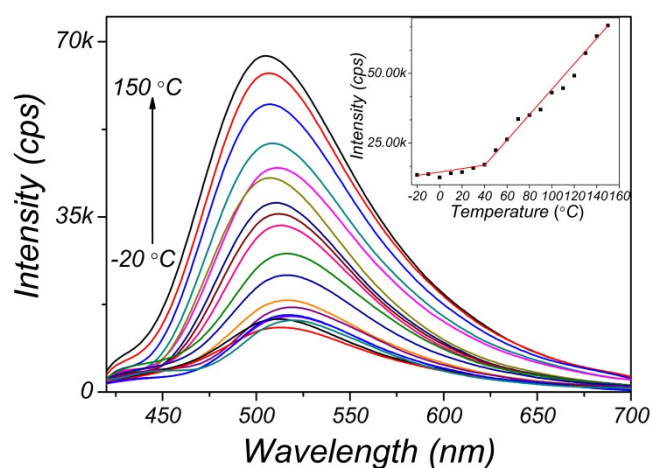

Figure S15 Fluorescent emission spectra of NapPT-2 in MOE ( $5.0 \times 10^{-6}$  mol/L) recorded from -20 to 150 °C, Excitation wavelength: 400 nm.

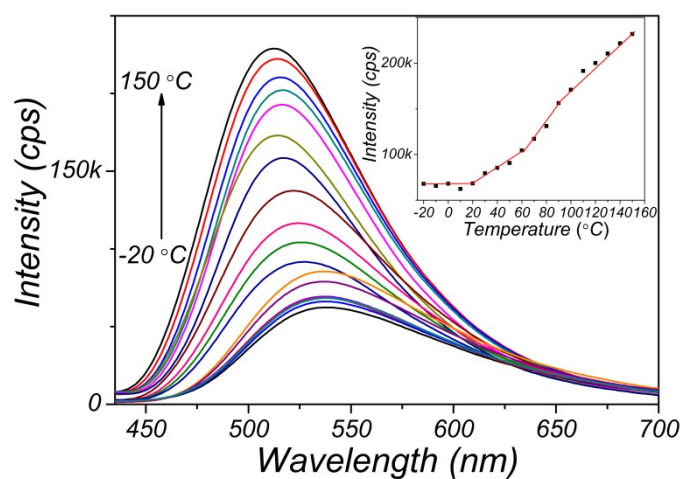

Figure S16 Fluorescent emission spectra of compound 2 in MOE ( $5.0 \times 10^{-6}$  mol/L) recorded from -20 to 150 °C, Excitation wavelength: 400 nm.

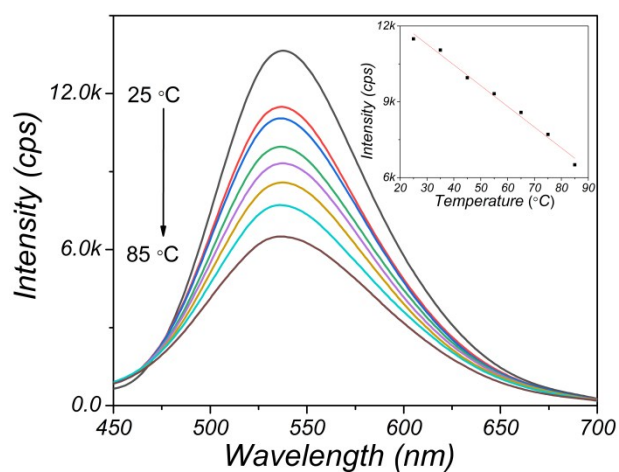

Figure S17 Fluorescent emission spectra of NapPT-2 in water ( $5.0 \times 10^{-6}$  mol/L) recorded from 15 to 95 °C. Excitation wavelength: 400 nm.

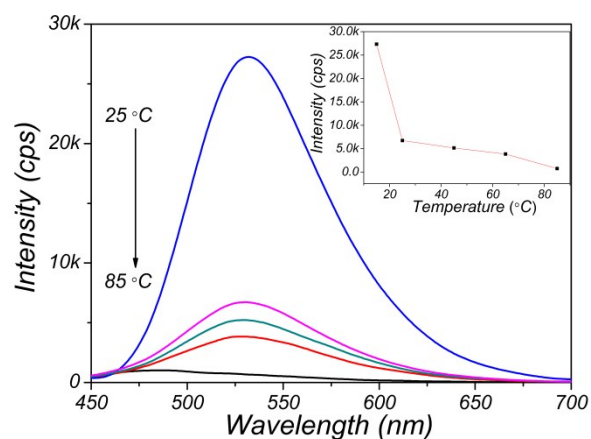

Figure S18 Fluorescent emission spectra of compound 2 in water ( $5.0 \times 10^{-6}$  mol/L) recorded from 15 to 95 °C. Excitation wavelength: 400 nm.

#### 4 The reversibility and stability of fluorescent sensor NapPT-2 in MOE and water

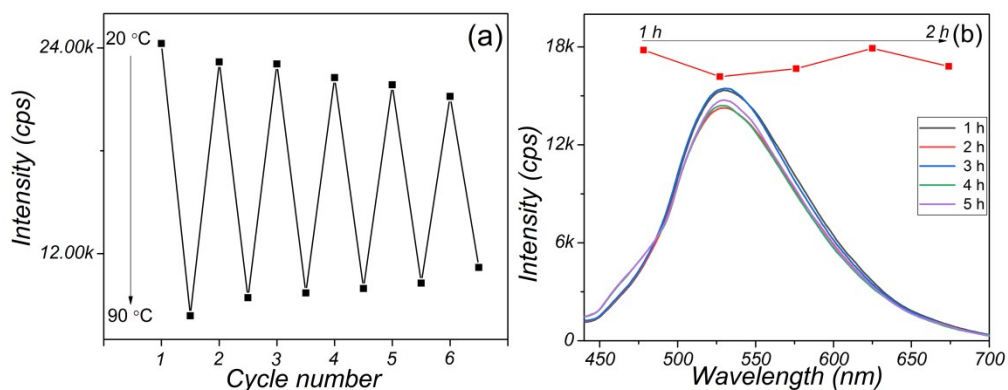

Fig. S19 (a) The fluorescent intensity of NapPT-1 ( $5.0 \times 10^{-6}$  mol/L) upon cycling temperature from 20 to 100 °C in water. (b) The fluorescent intensity of NapPT-1 ( $5.0 \times 10^{-6}$  mol/L) in water at 60 °C for 5 hours. All these measurements were carried out in ambient atmosphere.

#### 5 The density functional theory of NapPT-2 and compound 2

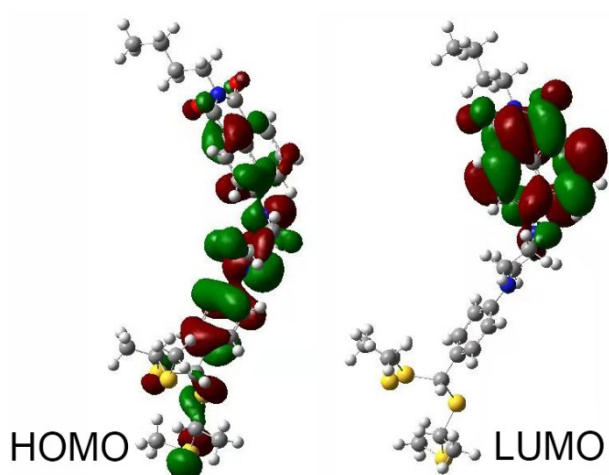

Figure S20 (a) HOMO and (b) LUMO of NapPT-2 by the density functional theory (DFT)

calculations at b3lyp/6-311++g(2df,2p) level

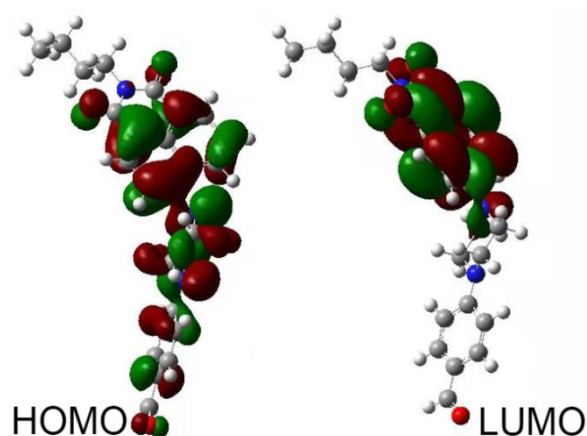

Figure S21 (a) HOMO and (b) LUMO of compound 2 by the density functional theory (DFT)

calculations at b3lyp/6-311++g(2df,2p) level

## 6 Fluorescent quantum yield of compound 2, NapPT-1 and NapPT-2 in all kinds of solvents

Table S1 Fluorescent quantum yield of compound 2, NapPT-1 and NapPT-2 in all

kinds of solvents

| Compounds  | Solvents  | $\lambda_{\text{Abs}}$ (nm) <sup>a</sup> | $\lambda_{\text{Flu}}$ (nm) <sup>b</sup> | $\Phi_{\text{f}}$ <sup>c</sup> |
|------------|-----------|------------------------------------------|------------------------------------------|--------------------------------|
| Compound 2 | water     | 390                                      | 525                                      | 0.022                          |
|            | THF       | 395                                      | 520                                      | 0.051                          |
|            | ACN       | 400                                      | 510                                      | 0.003                          |
|            | EtOH      | 390                                      | 525                                      | 0.002                          |
|            | DCM       | 390                                      | 495                                      | 0.153                          |
|            | Hexane    | 395                                      | 575                                      | 0.015                          |
|            | MOE       | 400                                      | 490                                      | 0.038                          |
|            | MOE -heat | 400                                      | 480                                      | 0.035                          |
| NapPT-1    | water     | 400                                      | 515                                      | 0.019                          |
|            | THF       | 400                                      | 525                                      | 0.004                          |
|            | ACN       | 390                                      | 500                                      | 0.008                          |
|            | EtOH      | 400                                      | 500                                      | 0.016                          |
|            | DCM       | 400                                      | 515                                      | 0.040                          |
|            | Hexane    | 400                                      | 525                                      | 0.038                          |
|            | MOE       | 390                                      | 545                                      | 0.004                          |
|            | MOE -heat | 380                                      | 545                                      | 0.022                          |
| NapPT-2    | water     | 400                                      | 125                                      | 0.005                          |
|            | THF       | 400                                      | 525                                      | 0.014                          |
|            | ACN       | 390                                      | 550                                      | 0.030                          |
|            | EtOH      | 400                                      | 510                                      | 0.008                          |
|            | DCM       | 400                                      | 490                                      | 0.057                          |
|            | Hexane    | 400                                      | 545                                      | 0.049                          |
|            | MOE       | 390                                      | 545                                      | 0.014                          |
|            | MOE -heat | 380                                      | 525                                      | 0.057                          |

<sup>a</sup> The maximum absorption wavelength.

<sup>b</sup> The maximum fluorescent emission wavelength ( $\lambda_{\text{ex}}$ = 400 nm).

<sup>c</sup> The fluorescence quantum yield measured by using fluorescein ( $\Phi_{\text{f}}$ =0.95±0.03) as a standard.

## 7 The fluorescent thermometer performance parameters

Table S2 The fluorescent thermometer performance parameters

| Compounds                                                                                                                 | Response type | $\lambda_{\text{em}}$ (nm) | Working range (K/°C) | $S_{\text{A}}$ <sup>a</sup>                          |
|---------------------------------------------------------------------------------------------------------------------------|---------------|----------------------------|----------------------|------------------------------------------------------|
| NapPT-1                                                                                                                   | Off-On        | 500/525                    | 253.15-423.15 K      | 0.0438 K <sup>-1</sup>                               |
| Y <sub>1.97</sub> Ho <sub>0.03</sub> O <sub>3</sub> /Mg <sub>2</sub> Ti <sub>0.99</sub> Mn <sub>0.01</sub> O <sub>4</sub> | On-Off        | 550/650                    | RT-100 °C            | 4.6% °C <sup>-1</sup> /<br>5.1% °C <sup>-1</sup> [1] |
| FIPAC                                                                                                                     | Ratio         | 442/595                    | 138-343 K            | 0.194 K <sup>-1</sup> [2]                            |
| Benzothiadiazole-PNNPAM-BODIPY                                                                                            | Ratio         | 515/580                    | 298-313 K            | 0.041 K <sup>-1</sup> [3]                            |
| Triarylphosphine oxide                                                                                                    | Ratio         | 380/480                    | 223-373 K            | 0.012 K <sup>-1</sup> [4]                            |

|                                      |        |         |           |                           |
|--------------------------------------|--------|---------|-----------|---------------------------|
| BODIPY derivatives with OEG dendrons | On-Off | 521     | 288-318 K | 0.024 K <sup>-1</sup> [5] |
| Mito thermo yellow                   | On-Off | 564     | 283-343 K | 0.025 K <sup>-1</sup> [6] |
| BAI                                  | On-Off | 559     | 283-323 K | 0.024 K <sup>-1</sup> [7] |
| DB-TPE nanoparticles                 | On-Off | 479     | 278-338 K | 0.011 K <sup>-1</sup> [8] |
| RhB, rhodamine110 labeled polymers   | Ratio  | 520/580 | 253-383 K | 0.07 6K <sup>-1</sup> [9] |
| 6-FAM                                | Ratio  | 515/575 | 273-373 K | 0.07 K <sup>-1</sup> [10] |

<sup>a</sup> The thermal sensitivity :  $S_A = \frac{1}{X_{ref}} \times \frac{\Delta X}{\Delta T}$  ; (X :  $\Phi_f$ ) <sup>11</sup>

## References

1. M. Sekulić, V. Đorđević, Z. Ristić, M. Medić and M. D. Dramićanin, *Advanced Optical Materials*, 2018, **6**.
2. J. Chen, Y. Wu, X. Wang, Z. Yu, H. Tian, J. Yao and H. Fu, *Phys Chem Chem Phys*, 2015, **17**, 27658-27664.
3. S. Uchiyama, T. Tsuji, K. Ikado, A. Yoshida, K. Kawamoto, T. Hayashi and N. Inada, *Analyst*, 2015, **140**, 4498-4506.
4. Q. Fang, J. Li, S. Li, R. Duan, S. Wang, Y. Yi, X. Guo, Y. Qian, W. Huang and G. Yang, *Chem Commun (Camb)*, 2017, **53**, 5702-5705.
5. H. Wang, Y. Wu, Y. Shi, P. Tao, X. Fan, X. Su and G. C. Kuang, *Chemistry*, 2015, **21**, 3219-3223.
6. S. Arai, M. Suzuki, S. J. Park, J. S. Yoo, L. Wang, N. Y. Kang, H. H. Ha and Y. T. Chang, *Chem Commun (Camb)*, 2015, **51**, 8044-8047.
7. V. F. Pais, J. M. Lassaletta, R. Fernandez, H. S. El-Sheshtawy, A. Ros and U. Pischel, *Chemistry*, 2014, **20**, 7638-7645.
8. A. Ozawa, A. Shimizu, R. Nishiyabu and Y. Kubo, *Chem Commun (Camb)*, 2015, **51**, 118-121.
9. Y. Wu, J. Liu, J. Ma, Y. Liu, Y. Wang and D. Wu, *ACS Appl Mater Interfaces*, 2016, **8**, 14396-14405.
10. Y. Wu, J. Liu, Y. Wang, K. Li, L. Li, J. Xu and D. Wu, *ACS Appl Mater Interfaces*, 2017, **9**, 11073-11081.
11. C. Gota, S. Uchiyama, T. Yoshihara, S. Tobita and T. Ohwada, *Journal of Physical Chemistry B*, 2008, **112**, 2829-2836.
